# Supplementary material for: Broadband photoresponse promoted by interfacial electron transfer in diketopyrrolopyrrole-based compound/ZnO hybrid nanocomposites
Source: Royal Society of Chemistry journal article supplement (doi:10.1039/c5nj02192h), 2015-12-01
Supplement: c5nj02192h1.pdf [file c5nj02192h1.pdf]

# Broadband Photoresponse Promoted by Interfacial Electron Transfer in Diketopyrrolepyrrole-Based Compound/ZnO Hybrid Nanocomposite

Hongtao Lin,<sup>a,b</sup> Yishi Wu,<sup>a,\*</sup> Zhenyi Yu<sup>a</sup> and Hongbing Fu<sup>a,\*</sup>

<sup>a</sup> Beijing National Laboratory for Molecular Science (BNLMS), Institute of Chemistry, Chinese Academy of Sciences, Beijing 100190, P. R. China. <sup>b</sup> College of Chemical Engineering, Shandong University of Technology, Zibo 255049, P. R. China.

\*E-mail: yswu@iccas.ac.cn; hongbing.fu@iccas.ac.cn

## Supporting Information

### Supporting Figures

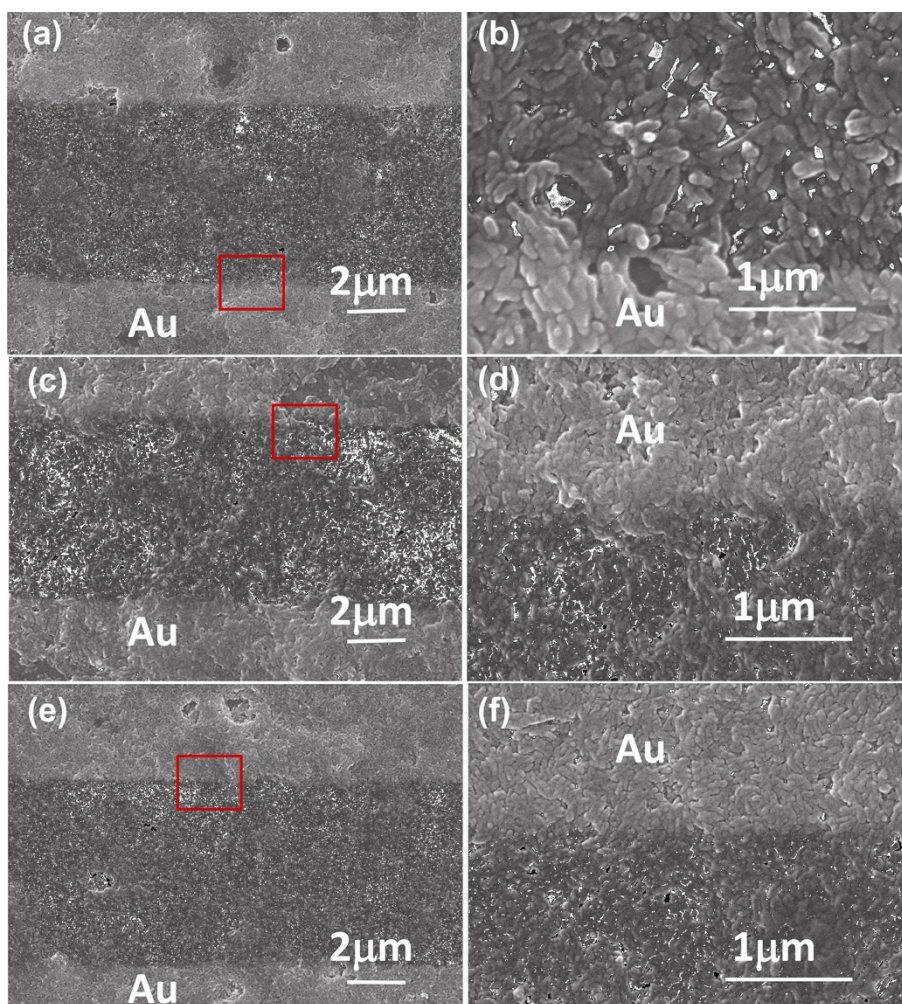

Figure S1. SEM images of the devices gaps for (a) ZnO nanorods and (b) the magnification of the bridging area between ZnO nanorods and Au electrode marked in red box in Figure (a), (c) TDPP/ZnO hybrid composite devices and (d) the magnification of the bridging area between ZnO nanorods and Au electrode marked in red box in Figure (c). (e) TTDPP/ZnO hybrid composite devices and (f) the magnification of the bridging area between ZnO nanorods and Au electrode marked in red box in Figure (e).

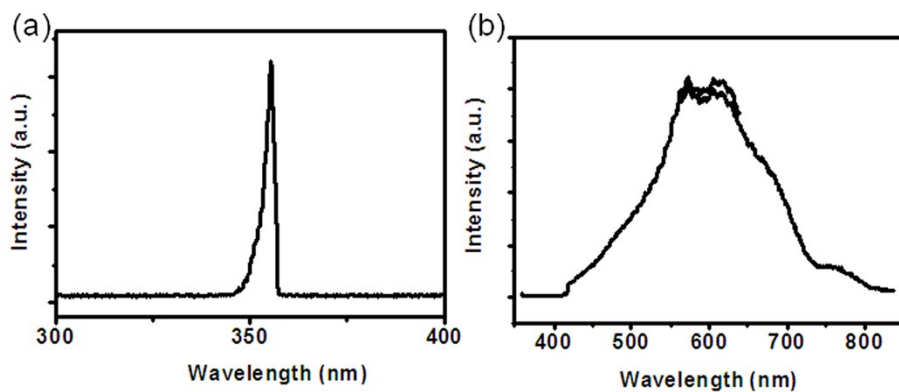

Figure S2. The spectra of (a) UV light filtered from xenon lamp ( $\lambda = 355\sim 365$  nm) and (b) iodine-tungsten lamp ( $\lambda = 450\sim 750$  nm).

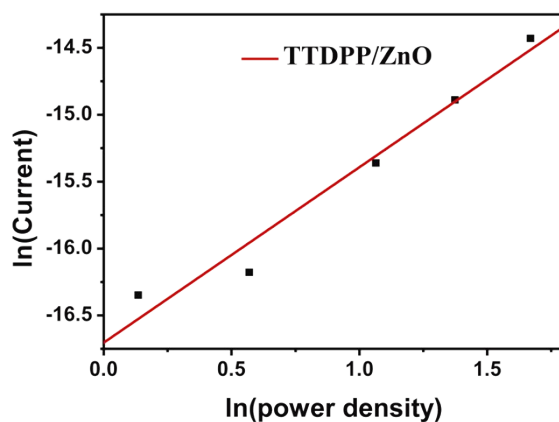

Figure S3. Corresponding fitting of photocurrent versus incident light density using equation:  $\ln(L) \propto C_2 \times \ln(P)$ . ( $C_2$  represents the photo-capture coefficient)
